# Supplementary material
Source: publisher figshare collection journal article supplement (https://frontiersin.figshare.com/ndownloader/files/28240551)
Supplement: Supplementary file 1 [file 28240551]

## Supplementary Materials

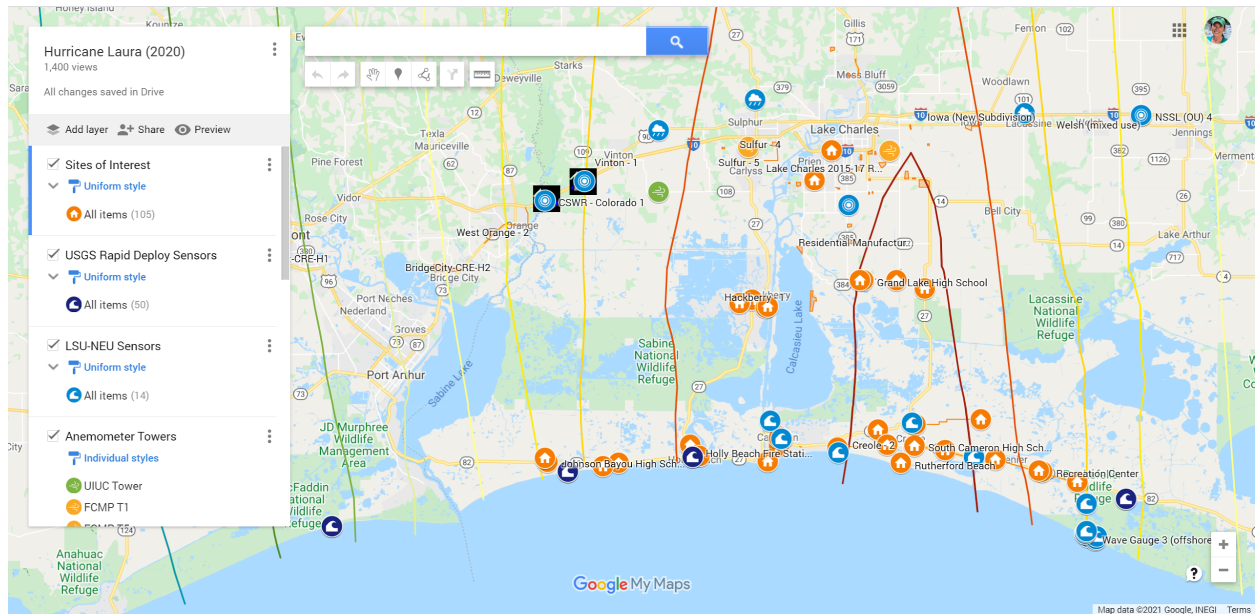

**Figure S1.** Example of [StEER Google Map](#) recording locations of hazard observations and potential structures of interest based on information exchanged during and following the landfall of Hurricane Laura.

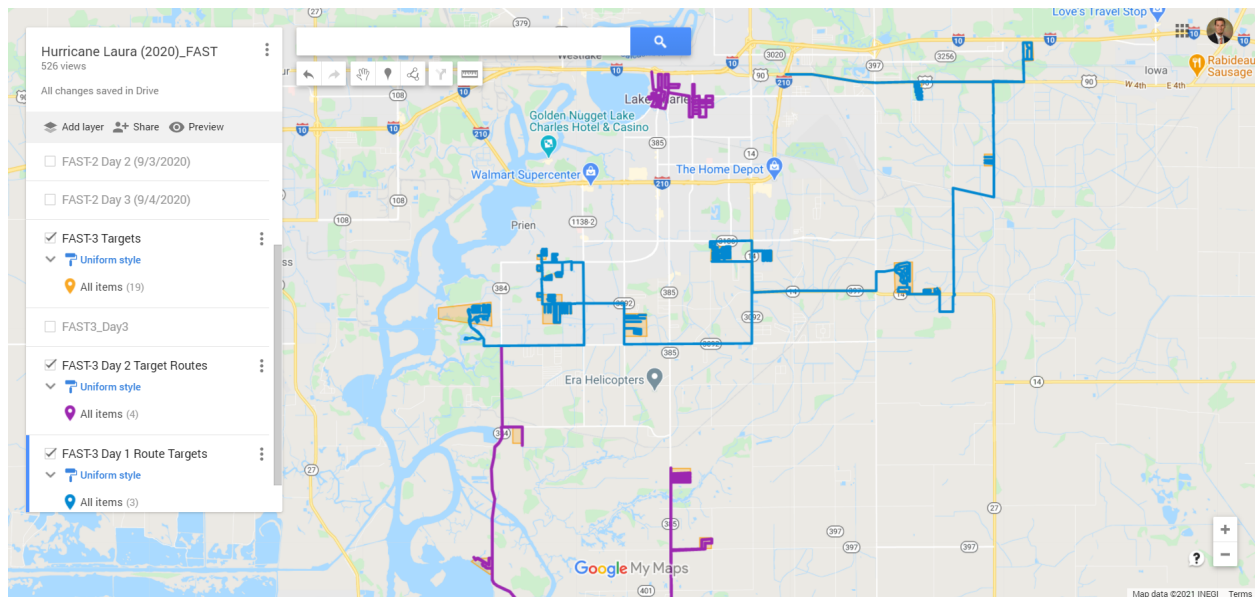

**Figure S2.** Example of [StEER Google Map](#) suggesting structures/routes for the FASTs deploying for Hurricane Laura.

| <b>Table S1. StEER Apps Available to Members</b>  |                                                                                                                                                  |                          |
|---------------------------------------------------|--------------------------------------------------------------------------------------------------------------------------------------------------|--------------------------|
| <b>App Name</b>                                   | <b>Use Case</b>                                                                                                                                  | <b>Number of Records</b> |
| StEER Building - US (windstorm) shared            | documentation of building performance of buildings following a windstorm                                                                         | V.2: 885                 |
|                                                   |                                                                                                                                                  | V1: 4,221                |
| StEER Earthquake Rapid Evaluation Form            | rapid documentation of performance of buildings following earthquake                                                                             | 66                       |
| StEER Hazard Indicator                            | documentation of hazard intensity                                                                                                                | 213                      |
| StEER Non-Building (Windstorm)                    | documentation of non-building structure performance following a windstorm                                                                        | 88                       |
| StEER Manufactured Home - US (Windstorm)          | detailed assessment of manufactured homes performance following windstorm                                                                        | 186                      |
| StEER Forensic Residential - US (Windstorm)       | detailed forensic assessment of low-rise residential buildings after windstorms                                                                  | 84                       |
| [Training] StEER Building - US (Windstorm)        | Training version of StEER Building - US (Windstorm) app                                                                                          | 79                       |
| [Training] StEER Earthquake Rapid Evaluation Form | Training version of StEER Earthquake Rapid Evaluation Form                                                                                       | 162                      |
| Hurricane Maria (2017) - Multi-Level              | Legacy App: Multi-level prototype for wind damage to caribbean typologies                                                                        | 702                      |
| Hurricane Irma (2017)                             | Legacy App: rapid assessments of exterior structural damage to structures in Florida following Hurricane Irma                                    | 1,121                    |
| Hurricane Harvey (2017) NSF RAPID shared          | Legacy App: rapid assessments of exterior structural damage to structures in Texas following Hurricane Harvey (Lombardo, Roueche, Krupar, Smith) | 1,201                    |
| Hurricane Harvey                                  | Legacy App: rapid assessments of exterior structural damage to structures in Texas following Hurricane Harvey (GEER Supplement, Kijewski-Correa) | 782                      |
| <b>Total Number of Records:</b>                   |                                                                                                                                                  | <b>5172</b>              |

| Table S2. Fields in StEER Building - US (windstorm) App                                                                                                                                                                                              |                      |                                                                                                                                                                                                                                              |
|------------------------------------------------------------------------------------------------------------------------------------------------------------------------------------------------------------------------------------------------------|----------------------|----------------------------------------------------------------------------------------------------------------------------------------------------------------------------------------------------------------------------------------------|
| <p>* indicates field priority</p> <p><i>Note: These are user-facing fields that can be adjusted/populated by the user, other non-editable metadata is generated for each record automatically by Fulcrum, e.g., user who created the record.</i></p> |                      |                                                                                                                                                                                                                                              |
| Field Name                                                                                                                                                                                                                                           | Format               | Response Choices/Description                                                                                                                                                                                                                 |
| <b>Metadata</b>                                                                                                                                                                                                                                      |                      |                                                                                                                                                                                                                                              |
| Record ID                                                                                                                                                                                                                                            | Text                 | Auto-populated                                                                                                                                                                                                                               |
| Damage State                                                                                                                                                                                                                                         | Single Choice        | 0=No Damage<br>1=Minor<br>2=Moderate<br>3=Severe<br>4=Destroyed                                                                                                                                                                              |
| Project                                                                                                                                                                                                                                              | Single Choice        | <Auto-populated list of all StEER Projects in Fulcrum>                                                                                                                                                                                       |
| Latitude                                                                                                                                                                                                                                             | Decimal              | Auto-populated                                                                                                                                                                                                                               |
| Longitude                                                                                                                                                                                                                                            | Decimal              | Auto-populated                                                                                                                                                                                                                               |
| <b>Basic Information</b>                                                                                                                                                                                                                             |                      |                                                                                                                                                                                                                                              |
| General Notes                                                                                                                                                                                                                                        | Text                 | <i>user-supplied general notes</i>                                                                                                                                                                                                           |
| Assessment Type                                                                                                                                                                                                                                      | Multiple Choice      | Aerial<br>Drive-by<br>On-site<br>Remote<br>General Area<br>Other                                                                                                                                                                             |
| Sampling Method*                                                                                                                                                                                                                                     | Classification Field | Biased - Damaged Structure<br>Biased - Unique failure<br>Biased - Case study<br>Biased - Other<br>Unbiased - Random Sample<br>Unbiased - Within a Cluster<br>Unbiased - Critical Facility<br>Unbiased - Unique Structure<br>Unbiased - Other |
| Overall Photos (Front, Left, Right, Back)*                                                                                                                                                                                                           | Photos               | <i>user-supplied photos</i>                                                                                                                                                                                                                  |
| Detailed Photos*                                                                                                                                                                                                                                     | Photos               | <i>user-supplied photos</i>                                                                                                                                                                                                                  |
| Audio                                                                                                                                                                                                                                                | Audio                | <i>user-supplied audio</i>                                                                                                                                                                                                                   |
| Google Street View                                                                                                                                                                                                                                   | Hyperlink            | <automatically linked in Fulcrum>                                                                                                                                                                                                            |

|                                 |                 |                                                                                                                                                                                                                                                                                                                                                                                                                                                                                                                                                       |
|---------------------------------|-----------------|-------------------------------------------------------------------------------------------------------------------------------------------------------------------------------------------------------------------------------------------------------------------------------------------------------------------------------------------------------------------------------------------------------------------------------------------------------------------------------------------------------------------------------------------------------|
| show_noaa_aerials               | Hyperlink       | <automatically linked in Fulcrum>                                                                                                                                                                                                                                                                                                                                                                                                                                                                                                                     |
| <b>Overall Damage</b>           |                 |                                                                                                                                                                                                                                                                                                                                                                                                                                                                                                                                                       |
| Overall Damage Notes            | Text            | <i>user-supplied damage notes</i>                                                                                                                                                                                                                                                                                                                                                                                                                                                                                                                     |
| Hazards Present                 | Multiple Choice | Flood<br>Rain<br>Surge<br>Tree-fall<br>Wind<br>Wind-borne debris<br>Unknown<br>Other                                                                                                                                                                                                                                                                                                                                                                                                                                                                  |
| Wind Damage Rating              | Single Choice   | No visible exterior damage;0<br>Minor: No more than 1 broken window, door or garage door. Less than 15% roof cover or wall cladding damage.;1<br>Moderate: Between 15% and 50% roof cover or wall cladding damage OR <5% roof substrate failure.;2<br>Severe: >50% roof cover / wall cladding damage OR 20-50% windows/doors damaged OR 5-25% roof sheathing loss OR <15% roof structure damage. ;3<br>Destruction: >15% roof structure failure OR failure of wall structure OR >25% roof deck loss OR >50% window/door damage;4<br>Not Applicable;-1 |
| Surge/Flood Damage Rating       | Single Choice   | No Damage or Very Minor Damage;0<br>Minor Damage;1<br>Moderate Damage;2<br>Severe Damage;3<br>Very Severe Damage;4<br>Partial Collapse;5<br>Collapse;6                                                                                                                                                                                                                                                                                                                                                                                                |
| Rainwater Ingress Damage Rating | Single Choice   | Unknown;-1<br>None visible;0<br>Minor ingress through doors, windows, or isolated roof leaks;1<br>Visible puddles of water or damaged contents around multiple doors and windows and multiple roof leaks leading to puddling or damage to contents;2<br>Severe inundation leading to partial collapse of roof ceiling, extensive puddling and interior contents loss;3<br>Complete inundation throughout the structure with majority of contents affected;4                                                                                           |
| Damage Indicator                | Numeric         | <i>User-supplied value defining the type of structure, relating to the Enhanced Fujita</i>                                                                                                                                                                                                                                                                                                                                                                                                                                                            |

|                            |                      |                                                                                                                                                                                                                                                                                                                                                                                                                                                                                                                                                                                                                                                                                                                                                                                                                                                                                                                                                                                                                                                                                                                                                                                                                                                                                                                                                                    |
|----------------------------|----------------------|--------------------------------------------------------------------------------------------------------------------------------------------------------------------------------------------------------------------------------------------------------------------------------------------------------------------------------------------------------------------------------------------------------------------------------------------------------------------------------------------------------------------------------------------------------------------------------------------------------------------------------------------------------------------------------------------------------------------------------------------------------------------------------------------------------------------------------------------------------------------------------------------------------------------------------------------------------------------------------------------------------------------------------------------------------------------------------------------------------------------------------------------------------------------------------------------------------------------------------------------------------------------------------------------------------------------------------------------------------------------|
|                            |                      | <i>Scale (primarily used for tornadoes)</i>                                                                                                                                                                                                                                                                                                                                                                                                                                                                                                                                                                                                                                                                                                                                                                                                                                                                                                                                                                                                                                                                                                                                                                                                                                                                                                                        |
| Degree of Damage           | Numeric              | <i>User-supplied value defining an overall damage state, relating to the Enhanced Fujita Scale (primarily used for tornadoes).</i>                                                                                                                                                                                                                                                                                                                                                                                                                                                                                                                                                                                                                                                                                                                                                                                                                                                                                                                                                                                                                                                                                                                                                                                                                                 |
| <b>Building Attributes</b> |                      |                                                                                                                                                                                                                                                                                                                                                                                                                                                                                                                                                                                                                                                                                                                                                                                                                                                                                                                                                                                                                                                                                                                                                                                                                                                                                                                                                                    |
| Attribute Notes            | Text                 | <i>User-supplied attribute notes</i>                                                                                                                                                                                                                                                                                                                                                                                                                                                                                                                                                                                                                                                                                                                                                                                                                                                                                                                                                                                                                                                                                                                                                                                                                                                                                                                               |
| Address                    | Address              | <Auto-populated by Fulcrum>                                                                                                                                                                                                                                                                                                                                                                                                                                                                                                                                                                                                                                                                                                                                                                                                                                                                                                                                                                                                                                                                                                                                                                                                                                                                                                                                        |
| Occupancy                  | Classification Field | Assembly-Small building and tenant spaces<br>Assembly-Theater<br>Assembly-Restaurant<br>Assembly-Religious facility<br>Assembly-Indoor sports facility<br>Assembly-Outdoors sports facility<br>Assembly-Other<br>Business<br>Educational-School<br>Educational-Daycare facilities<br>Educational-University/College<br>Educational-Other<br>Factory and industrial-Industrial<br>Factory and Industrial-Factory<br>Factory and Industrial Other<br>High-hazard-Hazardous materials storage<br>High-hazard-Contains detonation hazard<br>High-hazard-Contains deflagration hazard<br>High-hazard-Contains materials that are health hazard<br>High-hazard-Semiconductor fabrication facilities<br>High-hazard-Contains materials posing multiple hazards<br>High-hazard-Other<br>Institutional-Assisted living facilities<br>Institutional-Alcohol and drug rehabilitation<br>Institutional-Medical Care on a 24-hours basis (Hospital/psychiatric hospital)<br>Institutional-Correctional centers/jails/prisons/etc<br>Institutional-Other<br>Mercantile-Departmental stores<br>Mercantile-Drug stores<br>Mercantile-Gas/service station<br>Mercantile-Retail or wholesale stores<br>Mercantile-sales room<br>Mercantile-Other<br>Residential-Single family<br>Residential-Multi-family homes (duplex, triplex, townhome)<br>Residential-Mobile/Manufactured homes |

|                                      |                 |                                                                                                                                                                                                                                                                                                                                                                                                                                                                                                                                                                                                                                                                                                                                                                                                                                                       |
|--------------------------------------|-----------------|-------------------------------------------------------------------------------------------------------------------------------------------------------------------------------------------------------------------------------------------------------------------------------------------------------------------------------------------------------------------------------------------------------------------------------------------------------------------------------------------------------------------------------------------------------------------------------------------------------------------------------------------------------------------------------------------------------------------------------------------------------------------------------------------------------------------------------------------------------|
|                                      |                 | Residential-Apartment<br>houses/dormitories/fraternities and sororities<br>Residential-Hotel/motel/board<br>ing houses/congregate living facilities<br>Residential-Other<br>Storage-Moderate-hazard storage<br>Storage-Low-hazard storage<br>Storage-Other<br>Utilities and miscellaneous-Agricultural<br>building<br>Utilities and miscellaneous-Aircraft hangers<br>Utilities and miscellaneous-Barns<br>Utilities and miscellaneous-Carports<br>Utilities and miscellaneous-Fences > 6ft<br>Utilities and miscellaneous-Grain silos<br>Utilities and miscellaneous-Greenhouses<br>Utilities and miscellaneous-Livestock<br>shelters<br>Utilities and miscellaneous-Private garages<br>Utilities and miscellaneous-Retaining walls<br>Utilities and miscellaneous-Sheds<br>Utilities and miscellaneous-Stables<br>Utilities and miscellaneous-Other |
| Number of Stories                    | Numeric         | 1-25                                                                                                                                                                                                                                                                                                                                                                                                                                                                                                                                                                                                                                                                                                                                                                                                                                                  |
| Understory (% of Building Footprint) | Numeric         | 0% - 100%                                                                                                                                                                                                                                                                                                                                                                                                                                                                                                                                                                                                                                                                                                                                                                                                                                             |
| First Floor Elevation (feet)         | Numeric         | 0-13                                                                                                                                                                                                                                                                                                                                                                                                                                                                                                                                                                                                                                                                                                                                                                                                                                                  |
| Year Built                           | Numeric         | <i>User-supplied Four-digit year</i>                                                                                                                                                                                                                                                                                                                                                                                                                                                                                                                                                                                                                                                                                                                                                                                                                  |
| Roof Shape                           | Multiple Choice | Complex<br>Flat<br>Gable<br>Gable/Hip Combo<br>Gambrel<br>Hip<br>Mansard<br>Monoslope<br>Unknown<br>Other                                                                                                                                                                                                                                                                                                                                                                                                                                                                                                                                                                                                                                                                                                                                             |
| Roof Slope                           | Numeric         | <i>User-supplied numerical value (angle relative to horizontal)</i>                                                                                                                                                                                                                                                                                                                                                                                                                                                                                                                                                                                                                                                                                                                                                                                   |
| Front Elevation Orientation          | Numeric         | <i>User-supplied numerical value (degrees with 0=North, 90=East, etc.)</i>                                                                                                                                                                                                                                                                                                                                                                                                                                                                                                                                                                                                                                                                                                                                                                            |
| <b>Structural Attributes</b>         |                 |                                                                                                                                                                                                                                                                                                                                                                                                                                                                                                                                                                                                                                                                                                                                                                                                                                                       |
| Structural Notes                     | Text            | <i>User-supplied structural notes</i>                                                                                                                                                                                                                                                                                                                                                                                                                                                                                                                                                                                                                                                                                                                                                                                                                 |
| Building Type*                       | Multiple Choice | Wood Light Frame;W1                                                                                                                                                                                                                                                                                                                                                                                                                                                                                                                                                                                                                                                                                                                                                                                                                                   |

|                             |                 |                                                                                                                                                                                                                                                                                                                                                                                                                                                                                                                                                                                                                                                                                                                                        |
|-----------------------------|-----------------|----------------------------------------------------------------------------------------------------------------------------------------------------------------------------------------------------------------------------------------------------------------------------------------------------------------------------------------------------------------------------------------------------------------------------------------------------------------------------------------------------------------------------------------------------------------------------------------------------------------------------------------------------------------------------------------------------------------------------------------|
|                             |                 | Wood Frames, Commercial and Industrial;W2<br>Steel Moment Frames;S1<br>Steel Braced Frames;S2<br>Steel Light Frames;S3<br>Steel Frames with Concrete Shear WallsS4<br>Steel Frame with Infill Masonry Shear Walls;S5<br>Steel (unknown)<br>Concrete Moment Frames;C1<br>Concrete Shear Wall Buildings;C2<br>Concrete Frame with Infill Masonry Shear Walls;C3<br>Precast/Tilt-up Concrete Shear Wall Buildings;PC1<br>Precast Concrete Frames;PC2<br>Concrete (unknown)<br>Reinforced Masonry Bearing Wall Buildings with Flexible Diaphragms;RM1<br>Reinforced Masonry Bearing Wall Buildings with Stiff Diaphragms;RM2<br>Unreinforced Masonry Bearing Wall Buildings;URM<br>Masonry (unknown)<br>Wood (unknown)<br>Unknown<br>Other |
| <b>Walls and Foundation</b> |                 |                                                                                                                                                                                                                                                                                                                                                                                                                                                                                                                                                                                                                                                                                                                                        |
| Foundation Type*            | Single Choice   | Slab-on-grade<br>Cast-in-place concrete piers<br>Ground anchors and strapping<br>Reinforced masonry piers<br>Reinforced masonry stem wall<br>Unreinforced masonry piers<br>Unreinforced masonry stem wall<br>Wood Piers <= 8 ft<br>Wood Piers > 8 ft<br>Unknown<br>Other                                                                                                                                                                                                                                                                                                                                                                                                                                                               |
| Wall Anchorage Type*        | Multiple Choice | Anchor bolts with nuts and washers<br>Anchor bolts with missing nuts and washers<br>Metal straps<br>Concrete nails<br>Unknown<br>Other                                                                                                                                                                                                                                                                                                                                                                                                                                                                                                                                                                                                 |
| Wall Substrate              | Multiple Choice | Wood, sheathing (continuous)<br>Wood, sheathing (corners only)<br>Wood, dimensional planks<br>Insulated sheathing<br>Insulated foam board<br>Non-engineered wood panel                                                                                                                                                                                                                                                                                                                                                                                                                                                                                                                                                                 |

|                                        |                 |                                                                                                                                                                                                                                                                               |
|----------------------------------------|-----------------|-------------------------------------------------------------------------------------------------------------------------------------------------------------------------------------------------------------------------------------------------------------------------------|
|                                        |                 | Metal panels<br>Not Applicable<br>Unknown                                                                                                                                                                                                                                     |
| Wall Cladding                          | Multiple Choice | Aluminum siding<br>Brick<br>Curtain Wall<br>EIFS<br>Fiber-Cement Board<br>Corrugated steel panels<br>Plywood Siding<br>Stucco<br>Vinyl Siding (standard)<br>Vinyl Siding (high wind rated)<br>Vinyl Siding (unknown)<br>Wood Boards<br>Wood Shake/Shingle<br>Unknown<br>Other |
| Soffit Type                            | Multiple Choice | None<br>Vinyl<br>Metal<br>Wood<br>Unknown<br>Other                                                                                                                                                                                                                            |
| <b>Fenestration</b>                    |                 |                                                                                                                                                                                                                                                                               |
| Fenestration Protection*               | Multiple Choice | Front<br>Left<br>Back<br>Right<br>None<br>Other                                                                                                                                                                                                                               |
| Fenestration Protection Type*          | Multiple Choice | None<br>Unknown<br>Impact Resistant<br>Plywood/OSB Panel<br>Hurricane Shutter<br>Other                                                                                                                                                                                        |
| Sectional/Roll-Up/Garage Door Present? | Yes/No          | Yes<br>No<br>N/A                                                                                                                                                                                                                                                              |
| Large Door Opening location            | Multiple Choice | Front<br>Left<br>Back<br>Right<br>Other                                                                                                                                                                                                                                       |
| Large Door Opening Type*               | Multiple Choice | None<br>Single garage door (standard)                                                                                                                                                                                                                                         |



|                               |                 |                                                                                                                                                                                                                                                                                            |
|-------------------------------|-----------------|--------------------------------------------------------------------------------------------------------------------------------------------------------------------------------------------------------------------------------------------------------------------------------------------|
|                               |                 | Double garage door (standard)<br>Single garage door (wind-rated)<br>Double garage door (wind-rated)<br>Single garage door (unknown)<br>Double garage door (unknown)<br>Sectional door<br>Roll-up door<br>Other                                                                             |
| <b>Roof Structure</b>         |                 |                                                                                                                                                                                                                                                                                            |
| Roof System*                  | Multiple Choice | Steel, cold formed<br>Steel, hot rolled<br>Steel, joists<br>Concrete slab<br>Wood, rafter<br>Wood, trusses<br>Wood, unknown<br>Unknown<br>Other                                                                                                                                            |
| Roof-to-Wall Attachment*      | Multiple Choice | Toe-nails<br>Metal ties<br>Metal straps<br>Bolted connection<br>Welded connection<br>Unknown<br>Other                                                                                                                                                                                      |
| Roof-to-wall Attachment Type* | Text            | <i>User-supplied description</i>                                                                                                                                                                                                                                                           |
| Roof Substrate                | Single Choice   | Plywood/OSB<br>Dimensional lumber<br>Metal deck<br>Concrete<br>None<br>Unknown<br>Other                                                                                                                                                                                                    |
| Roof Cover                    | Multiple Choice | Asphalt shingles (3-tab)<br>Asphalt shingles (laminated)<br>Built-up with Gravel<br>Built-up without Gravel<br>Clay tiles<br>Concrete tiles<br>Metal shingles<br>Metal, corrugated<br>Metal, standing seam<br>Roll roofing<br>Single ply<br>Wood shake<br>Wood shingle<br>Unknown<br>Other |

|                                      |                 |                                                                                                                                                                              |
|--------------------------------------|-----------------|------------------------------------------------------------------------------------------------------------------------------------------------------------------------------|
| Secondary Water Barrier              | Multiple Choice | None<br>Closed-cell urethane foam adhesive<br>Fully adhered membrane<br>High performance underlayment<br>Self-adhering membrane over joints (~4" strips)<br>Unknown<br>Other |
| Overhang Length (inches)             | Numeric         | <i>User-supplied numerical value</i>                                                                                                                                         |
| Parapet Height (inches)              | Numeric         | <i>User-supplied numerical value</i>                                                                                                                                         |
| <b>Wind-induced Damage Levels</b>    |                 |                                                                                                                                                                              |
| Wind Damage Details                  | Text            | <i>User-supplied wind damage notes</i>                                                                                                                                       |
| Roof Structure Damage (%)            | Numeric         | 0%-100%                                                                                                                                                                      |
| Roof Substrate Damage (%)            | Numeric         | 0%-100%                                                                                                                                                                      |
| Roof Cover Damage (%)                | Numeric         | 0%-100%                                                                                                                                                                      |
| Wall Structure Damage (%)            | Numeric         | 0%-100%                                                                                                                                                                      |
| Wall Substrate Damage (%)            | Numeric         | 0%-100%                                                                                                                                                                      |
| Wall Cladding Damage (%)             | Numeric         | 0%-100%                                                                                                                                                                      |
| Damaged Windows (%)                  | Numeric         | 0%-100%                                                                                                                                                                      |
| Damaged Doors (%)                    | Numeric         | 0%-100%                                                                                                                                                                      |
| Location of Damaged Fenestration     | Multiple Choice | Front<br>Left<br>Back<br>Right<br>Other                                                                                                                                      |
| Sectional/Rollup/Garage Door Failure | Multiple Choice | None<br>Front<br>Left<br>Back<br>Right<br>All<br>Other                                                                                                                       |
| Soffit Damage (%)                    | Numeric         | 0%-100%                                                                                                                                                                      |
| Fascia Damage (%)                    | Numeric         | 0%-100%                                                                                                                                                                      |
| Stories with Damage                  | Text            | <i>User-supplied notes on affected stories</i>                                                                                                                               |
| <b>Surge-induced Damage</b>          |                 |                                                                                                                                                                              |

|                                      |                 |                                                                                                                                                                                                                                                                                                                                                                                                                                                                                                                                                                                                                          |
|--------------------------------------|-----------------|--------------------------------------------------------------------------------------------------------------------------------------------------------------------------------------------------------------------------------------------------------------------------------------------------------------------------------------------------------------------------------------------------------------------------------------------------------------------------------------------------------------------------------------------------------------------------------------------------------------------------|
| Water-Induced Damage Notes           | Text            | <i>User-supplied notes on water-induced damage</i>                                                                                                                                                                                                                                                                                                                                                                                                                                                                                                                                                                       |
| Percent of Building Footprint Eroded | Numeric         | 0%-100%                                                                                                                                                                                                                                                                                                                                                                                                                                                                                                                                                                                                                  |
| % Damage to Understory               | Numeric         | 0%-100%                                                                                                                                                                                                                                                                                                                                                                                                                                                                                                                                                                                                                  |
| Maximum Scour Depth (inches)         | Numeric         | <i>User-supplied numerical value</i>                                                                                                                                                                                                                                                                                                                                                                                                                                                                                                                                                                                     |
| % Piles Missing or Collapsed         | Numeric         | 0%-100%                                                                                                                                                                                                                                                                                                                                                                                                                                                                                                                                                                                                                  |
| % Piles Leaning or Broken            | Numeric         | 0%-100%                                                                                                                                                                                                                                                                                                                                                                                                                                                                                                                                                                                                                  |
| Cause of Foundation Damage           | Multiple Choice | Erosion<br>Wave<br>Flood<br>Floating Debris<br>Velocity Scour<br>None<br>Unknown<br>Other                                                                                                                                                                                                                                                                                                                                                                                                                                                                                                                                |
| <b>Building Retrofits</b>            |                 |                                                                                                                                                                                                                                                                                                                                                                                                                                                                                                                                                                                                                          |
| Reroof Year                          | Numeric         | <i>User-supplied four-digit year</i>                                                                                                                                                                                                                                                                                                                                                                                                                                                                                                                                                                                     |
| Retrofit Type (1)                    | Text            | <i>User-supplied descriptive text</i>                                                                                                                                                                                                                                                                                                                                                                                                                                                                                                                                                                                    |
| Retrofit (1) Year                    | Numeric         | <i>User-supplied four-digit year</i>                                                                                                                                                                                                                                                                                                                                                                                                                                                                                                                                                                                     |
| Retrofit Type (2)                    | Text            | <i>User-supplied descriptive text</i>                                                                                                                                                                                                                                                                                                                                                                                                                                                                                                                                                                                    |
| Retrofit (2) Year                    | Numeric         | <i>User-supplied four-digit year</i>                                                                                                                                                                                                                                                                                                                                                                                                                                                                                                                                                                                     |
| <b>Quality Control Tracking</b>      |                 |                                                                                                                                                                                                                                                                                                                                                                                                                                                                                                                                                                                                                          |
| Data Librarian(s)                    | Text            | <i>User-supplied name</i>                                                                                                                                                                                                                                                                                                                                                                                                                                                                                                                                                                                                |
| QC Progress Code                     | Single Choice   | In Progress;9<br>Stage 1 has been completed. Location and address have been verified. ;1<br>Stage 1 has been completed but the location and address have not been verified due to an error or unusual uncertainty. ;1e<br>Stage 2 and below has been completed. The minimum information for a completed assessment has been verified or added. ;2<br>Stage 2 and below has been completed but there is insufficient information to meet the minimum data standards for a complete record, or there is considerable uncertainty in assignment of one or more critical fields.;2e<br>Stage 3 and below has been completed. |

|          |      |                                                                                                                                                                                                                                                                                                                                                 |
|----------|------|-------------------------------------------------------------------------------------------------------------------------------------------------------------------------------------------------------------------------------------------------------------------------------------------------------------------------------------------------|
|          |      | <p>The majority of Stage 3 fields have been filled in and validated with reasonable confidence in accuracy and precision.;3<br/> Stage 3 and below has been completed but with low confidence in several fields.;3e<br/> Stage 4 and below has been completed.;4<br/> Final validation has been completed with automated and manual checks.</p> |
| QC Notes | Text | <p><i>User-supplied notes regarding the DEQC process</i></p>                                                                                                                                                                                                                                                                                    |

| Table S3. Fields in StEER Non-Buildings - Windstorm App                                                                                                                                                                                  |                 |                                                                                         |
|------------------------------------------------------------------------------------------------------------------------------------------------------------------------------------------------------------------------------------------|-----------------|-----------------------------------------------------------------------------------------|
| *indicates field priority<br><i>Note: These are user-facing fields that can be adjusted/populated by the user, other non-editable metadata is generated for each record automatically by Fulcrum, e.g., user who created the record.</i> |                 |                                                                                         |
| Field Name                                                                                                                                                                                                                               | Format          | Response Choices/Description                                                            |
| <b>Metadata</b>                                                                                                                                                                                                                          |                 |                                                                                         |
| Record ID                                                                                                                                                                                                                                | Text            | Auto-populated                                                                          |
| Damage State                                                                                                                                                                                                                             | Single Choice   | 0=No Damage<br>1=Minor<br>2=Moderate<br>3=Severe<br>4=Destroyed                         |
| Project                                                                                                                                                                                                                                  | Single Choice   | <Auto-populated list of all StEER Projects in Fulcrum>                                  |
| Latitude                                                                                                                                                                                                                                 | Decimal         | Auto-populated                                                                          |
| Longitude                                                                                                                                                                                                                                | Decimal         | Auto-populated                                                                          |
| <b>Basic Information</b>                                                                                                                                                                                                                 |                 |                                                                                         |
| Photos*                                                                                                                                                                                                                                  | Photos          | <i>user-supplied photos</i>                                                             |
| Audio                                                                                                                                                                                                                                    | Audio           | <i>user-supplied audio</i>                                                              |
| Non-Building Assessment Type                                                                                                                                                                                                             | Single Choice   | Power infrastructure<br>Bridge<br>Dam<br>Road<br>Other                                  |
| Damage                                                                                                                                                                                                                                   | Yes/No          | Yes<br>No                                                                               |
| Damage Level                                                                                                                                                                                                                             | Single Choice   | Undamaged<br>Minor<br>Moderate<br>Severe<br>Destruction                                 |
| Damage Source                                                                                                                                                                                                                            | Multiple Choice | Flood<br>Flood-borne debris<br>Landslide<br>Surge<br>Wind<br>Wind-borne debris<br>Other |

|                                        |                 |                                                                         |
|----------------------------------------|-----------------|-------------------------------------------------------------------------|
| General Notes                          | Text            | <i>user-supplied general notes</i>                                      |
| <b>General Non-Building Assessment</b> |                 |                                                                         |
| Description of Structure               | Text            | <i>User-supplied general description of structure</i>                   |
| Description of Damage                  | Text            | <i>User-supplied general description of damage</i>                      |
| <b>Power Infrastructure Form</b>       |                 |                                                                         |
| <b>Attributes</b>                      |                 |                                                                         |
| Type                                   | Single Choice   | Pole<br>Tower<br>Substation<br>Lines                                    |
| Material                               | Single Choice   | Timber<br>Concrete<br>Steel<br>Other                                    |
| Diameter/Width (in)*                   | Numeric         | <i>User-supplied diameter or width</i>                                  |
| Height/Length (m)                      | Numeric         | <i>User-supplied height or length</i>                                   |
| <b>Damage</b>                          |                 |                                                                         |
| Damage Type                            | Single Choice   | Undamaged<br>Leaning<br>Fallen<br>Snapped<br>Other                      |
| Damage Distribution                    | Single Choice   | Isolated<br>Common<br>Uniform<br>Other                                  |
| <b>Bridge Form</b>                     |                 |                                                                         |
| <b>Attributes</b>                      |                 |                                                                         |
| Bridge Use                             | Single Choice   | Pedestrian<br>Vehicular<br>Railroad                                     |
| Material                               | Multiple Choice | Pre-Cast Concrete<br>Cast in Place Concrete<br>Steel<br>Timber<br>Other |

|                    |               |                                                                                                                                                                                                                                    |
|--------------------|---------------|------------------------------------------------------------------------------------------------------------------------------------------------------------------------------------------------------------------------------------|
| Length or Span (m) | Numeric       | <i>User-supplied length or span of bridge</i>                                                                                                                                                                                      |
| Number of Lanes    | Numeric       | <i>User-supplied number of lanes</i>                                                                                                                                                                                               |
| <b>Damage</b>      |               |                                                                                                                                                                                                                                    |
| Damage State       | Single Choice | Undamaged;0<br>Light damage, still in use;1<br>Moderate damage, out of use but repairable;2<br>Severe damage, structure remains but not repairable;3<br>Collapsed;4                                                                |
| Functional?        | Single Choice | Yes<br>No<br>Don't Know                                                                                                                                                                                                            |
| <b>Dam Form</b>    |               |                                                                                                                                                                                                                                    |
| <b>Attributes</b>  |               |                                                                                                                                                                                                                                    |
| Material           | Single Choice | Earth<br>Concrete<br>Steel<br>Other                                                                                                                                                                                                |
| Length or Span (m) | Numeric       | <i>User-supplied length or span of dam</i>                                                                                                                                                                                         |
| Height (m)         | Numeric       | <i>User-supplied height of dam</i>                                                                                                                                                                                                 |
| Thickness*         | Numeric       | <i>User-supplied thickness of dam</i>                                                                                                                                                                                              |
| <b>Damage</b>      |               |                                                                                                                                                                                                                                    |
| Damage State       | Single Choice | Undamaged;0<br>Light damage, repairable, maintaining function;1<br>Moderate damage, repairable, minimal loss of function;2<br>Severe damage, non-repairable, moderate loss of function;3<br>Destroyed, no longer serves function;4 |
| <b>QC</b>          |               |                                                                                                                                                                                                                                    |
| QC ID              | Text          | <i>User-supplied name</i>                                                                                                                                                                                                          |
| QC Code            | Single Choice | 0<br>1a<br>1b<br>1c<br>2a<br>2b                                                                                                                                                                                                    |

|          |      |                                                       |
|----------|------|-------------------------------------------------------|
| QC Notes | Text | <i>User-supplied notes regarding the DEQC process</i> |
|----------|------|-------------------------------------------------------|



| Table S4. Fields in StEER Earthquake Rapid Evaluation App                                                                                                                                                                                       |               |                                                                                                    |
|-------------------------------------------------------------------------------------------------------------------------------------------------------------------------------------------------------------------------------------------------|---------------|----------------------------------------------------------------------------------------------------|
| <i>*indicates field priority</i><br><i>Note: These are user-facing fields that can be adjusted/populated by the user, other non-editable metadata is generated for each record automatically by Fulcrum, e.g., user who created the record.</i> |               |                                                                                                    |
| Field Name                                                                                                                                                                                                                                      | Format        | Response Choices/Description                                                                       |
| <b>Metadata</b>                                                                                                                                                                                                                                 |               |                                                                                                    |
| Record ID                                                                                                                                                                                                                                       | Text          | Auto-populated                                                                                     |
| Damage State                                                                                                                                                                                                                                    | Single Choice | 0=No Damage<br>1=Minor<br>2=Moderate<br>3=Severe<br>4=Destroyed                                    |
| Project                                                                                                                                                                                                                                         | Single Choice | <Auto-populated list of all StEER Projects in Fulcrum>                                             |
| Latitude                                                                                                                                                                                                                                        | Decimal       | Auto-populated                                                                                     |
| Longitude                                                                                                                                                                                                                                       | Decimal       | Auto-populated                                                                                     |
| <b>Inspection</b>                                                                                                                                                                                                                               |               |                                                                                                    |
| Inspector Name                                                                                                                                                                                                                                  | Text          | <i>user-supplied name</i>                                                                          |
| Affiliation                                                                                                                                                                                                                                     | Text          | <i>user-supplied affiliation</i>                                                                   |
| Date                                                                                                                                                                                                                                            | Date          | Auto-populated                                                                                     |
| Inspection Type                                                                                                                                                                                                                                 | Single Choice | Building<br>Lifelines<br>Bridges<br>Liquefaction<br>Landslide<br>Fault Rupture<br>Tsunami<br>Other |
| Areas Inspected                                                                                                                                                                                                                                 | Single Choice | Exterior<br>Exterior and Interior                                                                  |
| <b>Media Attachment</b>                                                                                                                                                                                                                         |               |                                                                                                    |
| Audio                                                                                                                                                                                                                                           | Audio         | <i>user-supplied audio</i>                                                                         |
| Overview Photos*                                                                                                                                                                                                                                | Photos        | <i>user-supplied photos</i>                                                                        |
| Detail Photos                                                                                                                                                                                                                                   | Photos        | <i>user-supplied photos</i>                                                                        |

| Overall Damage                  |                 |                                                                                                                                                                                                                                                                                                               |
|---------------------------------|-----------------|---------------------------------------------------------------------------------------------------------------------------------------------------------------------------------------------------------------------------------------------------------------------------------------------------------------|
| Overall Damage Notes            | Text            | <i>User-supplied overall damage notes</i>                                                                                                                                                                                                                                                                     |
| Overall Damage Rating           | Single Choice   | None or very minor;0<br>Minor;1<br>Moderate;2<br>Severe;3<br>Collapsed;4                                                                                                                                                                                                                                      |
| Functionality State             | Single Choice   | Completely functional;0<br>Mostly functional;1<br>Partially functional;2<br>Mostly unfunctional;3<br>Completely unfunctional;4                                                                                                                                                                                |
| Site Attributes and Description |                 |                                                                                                                                                                                                                                                                                                               |
| Structure ID                    | Text            | <i>User-supplied site or structure identification</i>                                                                                                                                                                                                                                                         |
| Field Notes                     | Text            | <i>User-supplied notes on site</i>                                                                                                                                                                                                                                                                            |
| Building Description            |                 |                                                                                                                                                                                                                                                                                                               |
| Building Name                   | Text            | <i>User-supplied name of building (if any)</i>                                                                                                                                                                                                                                                                |
| Address                         | Address         | <i>User-supplied address</i>                                                                                                                                                                                                                                                                                  |
| Building contact/phone          | Text            | <i>User-supplied point of contact</i>                                                                                                                                                                                                                                                                         |
| Number of Stories Above Ground  | Numeric         | <i>User-supplied number of above grade stories</i>                                                                                                                                                                                                                                                            |
| Number of Stories Below Ground* | Numeric         | <i>User-supplied number of below grade stories</i>                                                                                                                                                                                                                                                            |
| Approx. Footprint Area (sq.ft.) | Numeric         | <i>User-supplied footprint area</i>                                                                                                                                                                                                                                                                           |
| Type of Construction*           | Multiple Choice | Wood light frames;W1<br>Wood Frames, Commercial and Industrial;W2<br>Steel Moment Frames;S1<br>Steel Braced Frames;S2<br>Steel Light Frame;S3<br>Steel Frames with Concrete Shear Walls;S4<br>Steel Frames with Infill Masonry Shear Walls;S5<br>Concrete Moment Frame;C1<br>Concrete Shear Wall Buildings;C2 |

|                                                           |               |                                                                                                                                                                                                                                                                                                                                                                                     |
|-----------------------------------------------------------|---------------|-------------------------------------------------------------------------------------------------------------------------------------------------------------------------------------------------------------------------------------------------------------------------------------------------------------------------------------------------------------------------------------|
|                                                           |               | Concrete Frames with Infill<br>Masonry Shear Walls;C3<br>Precast/Tilt-up Concrete Shear<br>Wall Buildings;PC1<br>Precast Concrete Frames;PC2<br>Reinforced Masonry Bearing Wall<br>Buildings with Flexible<br>Diaphragms;RM1<br>Reinforced Masonry Bearing Wall<br>Buildings with Stiff<br>Diaphragms;RM2<br>Unreinforced Masonry Bearing<br>Wall Buildings;URM<br>Unknown<br>Other |
| Primary Occupancy                                         | Single Choice | Dwelling<br>Other residential<br>Public Assembly<br>Emergency services<br>Commercial<br>Offices<br>Industrial<br>Government<br>Historic<br>School<br>Unknown<br>Other                                                                                                                                                                                                               |
| Year Constructed                                          | Numeric       | <i>user-supplied year built</i>                                                                                                                                                                                                                                                                                                                                                     |
| Other Building Information                                | Text          | <i>User-supplied descriptive building<br/>information</i>                                                                                                                                                                                                                                                                                                                           |
| <b>Building Evaluation</b>                                |               |                                                                                                                                                                                                                                                                                                                                                                                     |
| General Comments                                          | Text          | <i>User-supplied comments</i>                                                                                                                                                                                                                                                                                                                                                       |
| <b>Observed Conditions</b>                                |               |                                                                                                                                                                                                                                                                                                                                                                                     |
| Collapse, partial collapse, or<br>building off foundation | Single Choice | Minor/None<br>Moderate<br>Severe                                                                                                                                                                                                                                                                                                                                                    |
| Building or story leaning                                 | Single Choice | Minor/None<br>Moderate<br>Severe                                                                                                                                                                                                                                                                                                                                                    |
| Racking damage to walls,<br>other structural damage       | Single Choice | Minor/None<br>Moderate<br>Severe                                                                                                                                                                                                                                                                                                                                                    |
| Chimney, parapet, or other<br>falling hazard              | Single Choice | Minor/None<br>Moderate<br>Severe                                                                                                                                                                                                                                                                                                                                                    |

|                                            |                 |                                                       |
|--------------------------------------------|-----------------|-------------------------------------------------------|
| Ground slope movement or cracking          | Single Choice   | Minor/None<br>Moderate<br>Severe                      |
| Other Hazard (Specify)                     | Single Choice   | Minor/None<br>Moderate<br>Severe                      |
| Other Hazard Description                   | Text            | <i>User-supplied hazard description</i>               |
| <b>Further Actions</b>                     |                 |                                                       |
| Detailed Evaluation Recommended            | Multiple Choice | None<br>Structural<br>Geotechnical<br>Other           |
| Other Recommendations                      | Text            | <i>User-supplied recommendations</i>                  |
| Comments                                   | Text            | <i>User-supplied comments</i>                         |
| <b>Data Enrichment and Quality Control</b> |                 |                                                       |
| Data Librarian(s)                          | Text            | <i>User-supplied name</i>                             |
| DE/QC Stage                                | Single Choice   | 0<br>1<br>1e<br>2<br>2e                               |
| DE/QC Notes                                | Text            | <i>User-supplied notes regarding the DEQC process</i> |

| Table S5. Fields in StEER Hazard Indicator App                                                                                                                                                                                                   |               |                                                                            |
|--------------------------------------------------------------------------------------------------------------------------------------------------------------------------------------------------------------------------------------------------|---------------|----------------------------------------------------------------------------|
| <i>* indicates field priority</i><br><i>Note: These are user-facing fields that can be adjusted/populated by the user, other non-editable metadata is generated for each record automatically by Fulcrum, e.g., user who created the record.</i> |               |                                                                            |
| Field Name                                                                                                                                                                                                                                       | Format        | Response Choices/Description                                               |
| <b>Metadata</b>                                                                                                                                                                                                                                  |               |                                                                            |
| Record ID                                                                                                                                                                                                                                        | Text          | Auto-populated                                                             |
| Damage State                                                                                                                                                                                                                                     | Single Choice | 0=No Damage<br>1=Minor<br>2=Moderate<br>3=Severe<br>4=Destroyed            |
| Project                                                                                                                                                                                                                                          | Single Choice | <Auto-populated list of all StEER Projects in Fulcrum>                     |
| Latitude                                                                                                                                                                                                                                         | Decimal       | Auto-populated                                                             |
| Longitude                                                                                                                                                                                                                                        | Decimal       | Auto-populated                                                             |
| <b>Basic Information</b>                                                                                                                                                                                                                         |               |                                                                            |
| Photos*                                                                                                                                                                                                                                          | Photos        | <i>user-supplied photos</i>                                                |
| Audio                                                                                                                                                                                                                                            | Audio         | <i>user-supplied audio</i>                                                 |
| Hazard Type                                                                                                                                                                                                                                      | Single Choice | Flood<br>Flood-borne debris<br>Surge<br>Wind<br>Wind-borne debris<br>Other |
| Notes                                                                                                                                                                                                                                            | Text          | <i>user-supplied general notes</i>                                         |
| <b>Wind Hazard</b>                                                                                                                                                                                                                               |               |                                                                            |
| Wind Indicator Class                                                                                                                                                                                                                             | Single Choice | Tree<br>Tower<br>Sign<br>Other                                             |
| <b>Tree</b>                                                                                                                                                                                                                                      |               |                                                                            |
| Tree Species*                                                                                                                                                                                                                                    | Text          | <i>user-supplied tree species</i>                                          |
| Tree Height (ft)                                                                                                                                                                                                                                 | Numeric       | <i>user-supplied tree height</i>                                           |
| Tree Projected Area                                                                                                                                                                                                                              | Numeric       | <i>user-supplied tree projected area</i>                                   |

|                          |                 |                                                                                                                       |
|--------------------------|-----------------|-----------------------------------------------------------------------------------------------------------------------|
| Tree Damage State        | Single Choice   | Undamaged<br>Small branches torn off<br>Large branches torn off<br>Partially uprooted<br>Uprooted<br>Trunk snapped    |
| Tree Damage Distribution | Single Choice   | No nearby trees<br>Isolated (<15%)<br>Common (15% - 50%)<br>Typical (50% - 75%)<br>Uniform (80%-100%)<br>Other        |
| Tree-fall Direction      | Numeric         | <i>user-supplied tree fall direction (Degrees, 0=North &amp; 90=East)</i>                                             |
| <b>Tower</b>             |                 |                                                                                                                       |
| Tower Use                | Text            | <i>user-supplied tower use</i>                                                                                        |
| Tower Structure Type     | Single Choice   | Solid<br>Trussed<br>Open<br>Other                                                                                     |
| Tower Material*          | Multiple Choice | Steel<br>Wood<br>Aluminum<br>Concrete<br>Other                                                                        |
| Tower Height (ft)        | Numeric         | <i>user-supplied tower height in feet</i>                                                                             |
| Tower Damage State       | Single Choice   | Undamaged<br>Leaning, straight<br>Leaning, plastic hinge<br>Collapsed, anchorage failure<br>Collapsed, member failure |
| Tower Projected Area     | Numeric         | <i>user-supplied tower projected area</i>                                                                             |
| Tower Failure Direction  | Numeric         | <i>user-supplied tower failure direction</i>                                                                          |
| <b>Sign</b>              |                 |                                                                                                                       |
| Sign Use                 | Text            | <i>user-supplied description of sign use</i>                                                                          |
| Sign Structure Type      | Single Choice   | Solid<br>Trussed<br>Open<br>Other                                                                                     |
| Sign Material*           | Multiple Choice | Steel<br>Wood                                                                                                         |

|                                  |               |                                                                                                                                                 |
|----------------------------------|---------------|-------------------------------------------------------------------------------------------------------------------------------------------------|
|                                  |               | Aluminum<br>Concrete<br>Other                                                                                                                   |
| Sign Height (ft)                 | Numeric       | <i>user-supplied sign height</i>                                                                                                                |
| Sign Damage State                | Single Choice | Undamaged<br>Leaning, straight<br>Leaning, plastic hinge<br>Collapsed, anchorage failure<br>Collapsed, member failure<br>Other                  |
| Sign Projected Area              | Numeric       | <i>user-supplied sign projected area</i>                                                                                                        |
| Sign Failure Direction           | Numeric       | <i>user-supplied sign failure direction in degrees (0=North, 90=East)</i>                                                                       |
| <b>Surge or Flood Inundation</b> |               |                                                                                                                                                 |
| Site Description                 | Text          | <i>user-supplied site description</i>                                                                                                           |
| <b>Datum</b>                     |               |                                                                                                                                                 |
| Horizontal Datum*                | Single Choice | NAD27<br>NAD83<br>WGS84<br>Other                                                                                                                |
| Horizontal Datum Source*         | Single Choice | Digital map<br>GNSS<br>handheld GPS<br>Mobile device                                                                                            |
| Vertical Datum Source*           | Single Choice | Differential Levels<br>GNSS (Network)<br>GNSS (Rapid Static)<br>GNSS (RTN)<br>GNSS (Static)<br>Hand Level<br>Tapedown<br>Total Station<br>Other |
| Vertical Datum*                  | Single Choice | Arbitrary<br>NAVD'88<br>NGCD'29<br>PRVD'02<br>Other                                                                                             |
| HWM Objective Point*             | Single Choice | GNSS BM<br>NGS BM<br>RM<br>RP<br>Other                                                                                                          |

| HWM                        |               |                                                                                                                                                 |
|----------------------------|---------------|-------------------------------------------------------------------------------------------------------------------------------------------------|
| HWM Elevation*             | Numeric       | <i>user-supplied hwm elevation</i>                                                                                                              |
| HWM Elevation +/-*         | Numeric       | <i>user-supplied hwm elevation uncertainty</i>                                                                                                  |
| HWM Elevation Units*       | Text          | Inches<br>Meter                                                                                                                                 |
| Elevation Source*          | Single Choice | Differential Levels<br>GNSS (Network)<br>GNSS (Rapid Static)<br>GNSS (RTN)<br>GNSS (Static)<br>Hand Level<br>Tapedown<br>Total Station<br>Other |
| HWM Type*                  | Single Choice | Debris line<br>Debris snag<br>Mud line<br>Present at peak<br>Seed line<br>Wash line<br>Other                                                    |
| HWM Marker*                | Single Choice | Chiseled mark<br>Marker<br>Nail<br>Nail and HWM tag<br>Not marked<br>Paint<br>Stake<br>Tape<br>other                                            |
| Tranquil/Stillwater HWM*   | Yes/No        | Yes<br>No                                                                                                                                       |
| HWM Height above Ground*   | Numeric       | <i>user-supplied hwm height above ground</i>                                                                                                    |
| HWM Description            | Text          | <i>user-supplied hwm description</i>                                                                                                            |
| Wind or Water-borne Debris |               |                                                                                                                                                 |
| Hazard Source              | Single Choice | Wind<br>Flood<br>Surge<br>Other                                                                                                                 |
| Debris Type                | Single Choice | Sheet<br>Block<br>Pipe                                                                                                                          |



|                                |               |                                                                                                       |
|--------------------------------|---------------|-------------------------------------------------------------------------------------------------------|
|                                |               | Disc<br>Fragment<br>Other                                                                             |
| Distance from Source           | Numeric       | <i>user-supplied distance from source</i>                                                             |
| Distance from Source<br>Units  | Text          | <i>user-supplied distance from source units</i>                                                       |
| Method of Distance<br>Estimate | Single Choice | <i>Digital map measurement<br/>Ground-based measurement device<br/>Visual approximation<br/>Other</i> |
| Debris Description             | Text          | <i>User-supplied debris description</i>                                                               |

| <b>Table S6. Participants in Illustrative Case Study Event Responses</b> |                                                                 |             |                   |                     |
|--------------------------------------------------------------------------|-----------------------------------------------------------------|-------------|-------------------|---------------------|
| <b>Member Name</b>                                                       | <b>Affiliation</b>                                              | <b>Team</b> | <b>Mission</b>    | <b>Role</b>         |
| David Roueche                                                            | Auburn University                                               | FAST        | Nashville Tornado | Lead                |
| Richard Wood                                                             | University of Nebraska Lincoln                                  | FAST        | Nashville Tornado | Lead                |
| Keith Cullum                                                             | Simpson Strong-Tie                                              | FAST        | Nashville Tornado | Participant         |
| Brett Davis                                                              | Auburn University                                               | FAST        | Nashville Tornado | Participant         |
| Mariantonieta Gutierrez Soto                                             | University of Kentucky                                          | FAST        | Nashville Tornado | Participant         |
| Sajad Javadinasab Hormozabad                                             | University of Kentucky                                          | FAST        | Nashville Tornado | Participant         |
| Yijun Liao                                                               | University of Nebraska Lincoln                                  | FAST        | Nashville Tornado | Participant         |
| Frank Lombardo                                                           | University of Illinois Urbana-Champaign                         | FAST        | Nashville Tornado | Participant         |
| Mohammad Moravej                                                         | Walker Consultants                                              | FAST        | Nashville Tornado | Participant         |
| Stephanie Pilkington                                                     | University of North Carolina Charlotte                          | FAST        | Nashville Tornado | Participant         |
| David O. Prevatt                                                         | University of Florida                                           | FAST        | Nashville Tornado | Participant         |
| Tracy Kijewski-Correa                                                    | University of Notre Dame                                        | VAST        | Nashville Tornado | Mission Coordinator |
| Wilfrid Djima                                                            | Independant Consultant                                          | VAST        | Nashville Tornado | Participant         |
| Ian Robertson                                                            | University of Hawaii at Manoa                                   | VAST        | Nashville Tornado | Participant         |
| Justin Marshall                                                          | Auburn University                                               | FAST        | Hurricane Dorian  | Lead                |
| Andrew Lyda                                                              | University of Washington, NHERI RAPID Experimental Facility     | FAST        | Hurricane Dorian  | Participant         |
| Daniel Smith                                                             | James Cook University (Australia), University of Florida & NCAR | FAST        | Hurricane Dorian  | Participant         |
| Andrew Kennedy                                                           | University of Notre Dame                                        | FAST        | Hurricane Dorian  | Lead                |
| James Kaihatu                                                            | Texas A&M University                                            | FAST        | Hurricane Dorian  | Participant         |
| Doug Allen                                                               | Simpson Strong-Tie                                              | FAST        | Hurricane Dorian  | Lead                |

|                               |                                                |      |                  |                     |
|-------------------------------|------------------------------------------------|------|------------------|---------------------|
| Davon Edgecombe               | Caribbean Coastal Services                     | FAST | Hurricane Dorian | Participant         |
| Terran Brice                  | Caribbean Coastal Services                     | FAST | Hurricane Dorian | Participant         |
| Kevin Brown                   | Caribbean Coastal Services                     | FAST | Hurricane Dorian | Participant         |
| Richard Wood                  | University of Nebraska, Lincoln                | FAST | Hurricane Dorian | Lead                |
| Henry Lester                  | University of South Alabama                    | FAST | Hurricane Dorian | Participant         |
| Mike Vorce                    | Site Tour 360                                  | FAST | Hurricane Dorian | Participant         |
| David Roueche                 | Auburn University                              | VAST | Hurricane Dorian | Lead                |
| Brett Davis                   | Auburn University                              | VAST | Hurricane Dorian | Participant         |
| Wilfrid Djima                 | Independent Consultant                         | VAST | Hurricane Dorian | Participant         |
| YeongAe Heo                   | Case Western Reserve University                | VAST | Hurricane Dorian | Participant         |
| Tracy Kijewski-Correa         | University of Notre Dame                       | VAST | Hurricane Dorian | Mission Coordinator |
| Mohammadtaghi Moravej         | Walker Consultants                             | VAST | Hurricane Dorian | Participant         |
| Brandon Rittelmeyer           | Auburn University                              | VAST | Hurricane Dorian | Participant         |
| Abdullahi Salman              | The University of Alabama in Huntsville        | VAST | Hurricane Dorian | Participant         |
| David O. Prevatt              | University of Florida                          | VAST | Hurricane Dorian | Participant         |
| Ian Robertson                 | University of Hawaii at Manoa                  | VAST | Hurricane Dorian | Participant         |
| Prethesha Alagusundaramoorthy | University of Kentucky                         | VAST | Hurricane Dorian | Participant         |
| Mohammed Alsieedi             | University of Florida                          | VAST | Hurricane Dorian | Participant         |
| Shane Crawford                | National Institute of Standards and Technology | VAST | Hurricane Dorian | Participant         |
| Mikael Gartner                | Consultant Humanitarian Engineer               | VAST | Hurricane Dorian | Participant         |
| Mariantonieta Gutierrez Soto  | University of Kentucky                         | VAST | Hurricane Dorian | Participant         |

|                               |                                             |      |                           |                     |
|-------------------------------|---------------------------------------------|------|---------------------------|---------------------|
| Henry Lester                  | University of South Alabama                 | VAST | Hurricane Dorian          | Participant         |
| Justin D. Marshall            | Auburn University                           | VAST | Hurricane Dorian          | Participant         |
| Laura Micheli                 | Catholic University of America              | VAST | Hurricane Dorian          | Participant         |
| Harish Kumar Mulchandani      | Birla Institute of Technology & Science     | VAST | Hurricane Dorian          | Participant         |
| Tori Tomiczek                 | United States Naval Academy                 | VAST | Hurricane Dorian          | Participant         |
| Khalid Mosalam                | University of California, Berkeley          | VAST | Hurricane Dorian          | Participant         |
| Ian Robertson                 | University of Hawaii at Manoa               | Both | Palu Earthquake & Tsunami | Mission Coordinator |
| Hendra Achiari                | Bandung Institute of Technology (Indonesia) | FAST | Palu Earthquake & Tsunami | Participant         |
| Miguel Esteban                | Waseda University (Japan)                   | FAST | Palu Earthquake & Tsunami | Participant         |
| Clemens Krautwald             | Tech. University of Braunschweig (Germany)  | FAST | Palu Earthquake & Tsunami | Participant         |
| Takahito Mikami               | Tokyo City University (Japan)               | FAST | Palu Earthquake & Tsunami | Participant         |
| Abdul Gafur Marzuki           | State Institute for Islamic Studies Palu    | FAST | Palu Earthquake & Tsunami | Participant         |
| Muhamad Fadel Hidayat Marzuki | Bandung Institute of Technology             | FAST | Palu Earthquake & Tsunami | Participant         |
| Ryota Nakamura                | Toyohashi University of Technology (Japan)  | FAST | Palu Earthquake & Tsunami | Participant         |
| Yuta Nishida                  | Waseda University                           | FAST | Palu Earthquake & Tsunami | Participant         |
| Tomoya Shibayama              | Waseda University (Japan)                   | FAST | Palu Earthquake & Tsunami | Participant         |
| Jacob Stolle                  | University of Ottawa (Canada)               | FAST | Palu Earthquake & Tsunami | Participant         |
| Tomoyuki Takabatake           | Waseda University (Japan)                   | FAST | Palu Earthquake & Tsunami | Participant         |
| Tracy Kijewski-Correa         | University of Notre Dame                    | VAST | Palu Earthquake & Tsunami | Participant         |

|                          |                                         |      |                           |                     |
|--------------------------|-----------------------------------------|------|---------------------------|---------------------|
| Harish Kumar Mulchandani | Birla Institute of Technology & Science | VAST | Palu Earthquake & Tsunami | Participant         |
| David Prevatt            | University of Florida                   | VAST | Palu Earthquake & Tsunami | Participant         |
| David Roueche            | Auburn University                       | VAST | Palu Earthquake & Tsunami | Participant         |
| Eduardo Miranda          | Stanford University                     | FAST | Puerto Rico Earthquakes   | Mission Coordinator |
| Jorge Archbold           | UC Berkeley                             | FAST | Puerto Rico Earthquakes   | Participant         |
| Pablo Heresi             | Stanford University                     | FAST | Puerto Rico Earthquakes   | Participant         |
| Armando Messina          | Stanford University                     | FAST | Puerto Rico Earthquakes   | Participant         |
| Isamar Rosa              | Stanford University                     | FAST | Puerto Rico Earthquakes   | Participant         |
| Tracy Kijewski-Correa    | University of Notre Dame                | VAST | Puerto Rico Earthquakes   | Participant         |
| Khalid Mosalam           | University of California, Berkeley      | VAST | Puerto Rico Earthquakes   | Participant         |
| David O. Prevatt         | University of Florida                   | VAST | Puerto Rico Earthquakes   | Participant         |
| Ian Robertson            | University of Hawaii                    | VAST | Puerto Rico Earthquakes   | Participant         |
| David Roueche            | Auburn University                       | VAST | Puerto Rico Earthquakes   | Participant         |
| David Roueche            | Auburn University                       | FAST | Hurricane Laura           | Lead                |
| Justin Marshall          | Auburn University                       | FAST | Hurricane Laura           | Participant         |
| Sabarethinam Kameshwar   | LSU                                     | FAST | Hurricane Laura           | Lead                |
| Naqib Mashrur            | LSU                                     | FAST | Hurricane Laura           | Participant         |
| Kevin Ambrose            | Auburn University                       | VAST | Hurricane Laura           | Participant         |
| Hadijah Rawajfih         | Auburn University                       | VAST | Hurricane Laura           | Participant         |
| Lily Rodriguez           | University of Notre Dame                | VAST | Hurricane Laura           | Participant         |
| Tracy Kijewski-Correa    | University of Notre Dame                | VAST | Hurricane Laura           | Mission             |

|                    |                                               |      |                 |             |
|--------------------|-----------------------------------------------|------|-----------------|-------------|
|                    |                                               |      |                 | Coordinator |
| Kurt Gurley        | University of Florida                         | VAST | Hurricane Laura | Participant |
| Irina Afanasyeva   | University of Florida                         | VAST | Hurricane Laura | Participant |
| Graham Brasic      | PES Structural Engineers                      | VAST | Hurricane Laura | Participant |
| John Cleary        | University of South Alabama                   | VAST | Hurricane Laura | Participant |
| Dmitrii Golovichev | University of Florida                         | VAST | Hurricane Laura | Participant |
| Oscar Lafontaine   | University of Florida                         | VAST | Hurricane Laura | Participant |
| Frank Lombardo     | University of Illinois Urbana-Champaign       | VAST | Hurricane Laura | Participant |
| Laura Micheli      | Catholic University of America                | VAST | Hurricane Laura | Participant |
| Brian Phillips     | University of Florida                         | VAST | Hurricane Laura | Participant |
| David Prevatt      | University of Florida                         | VAST | Hurricane Laura | Participant |
| Ian Robertson      | University of Hawaii, Manoa                   | VAST | Hurricane Laura | Participant |
| John Schroeder     | Texas Tech University                         | VAST | Hurricane Laura | Participant |
| Daniel Smith       | James Cook University   University of Florida | VAST | Hurricane Laura | Participant |
| Stephen Strader    | Villanova University                          | VAST | Hurricane Laura | Participant |
| Meredith Wilson    | University of Notre Dame                      | VAST | Hurricane Laura | Participant |
